# Supplementary material
Source: PubMed Central journal article supplement (PMC4988604)
Supplement: pnas.1521453113.sapp.pdf [file pnas.1521453113.sapp.pdf]

# Figure S1

## Figure S1. Oxylipin formation in acute inflammation and resolution.

Mean fold change in (A) COX products: eicosanoids; (B) 5-, 11-, 19- and 20-HETE; 9- and 13-HODE; (D) 8-, 12-, and 15-HETE; and (E) 9,10- and 12,13-EpOME, and 19,20-EpDPE following zymosan A challenge (1mg i.p.) 0-48h. Each mediator was normalized to its paired levels found in the naïve cavity in each experiment; the levels found in the naïve cavity given an arbitrary value of 1. 4h represents the peak of acute inflammation (PMNs), resolution peaks at 48h. Data is mean  $\pm$  s.e.m from 4-8 mice per group. \*denotes  $p < 0.05$  by one-sample t-test from 0h.

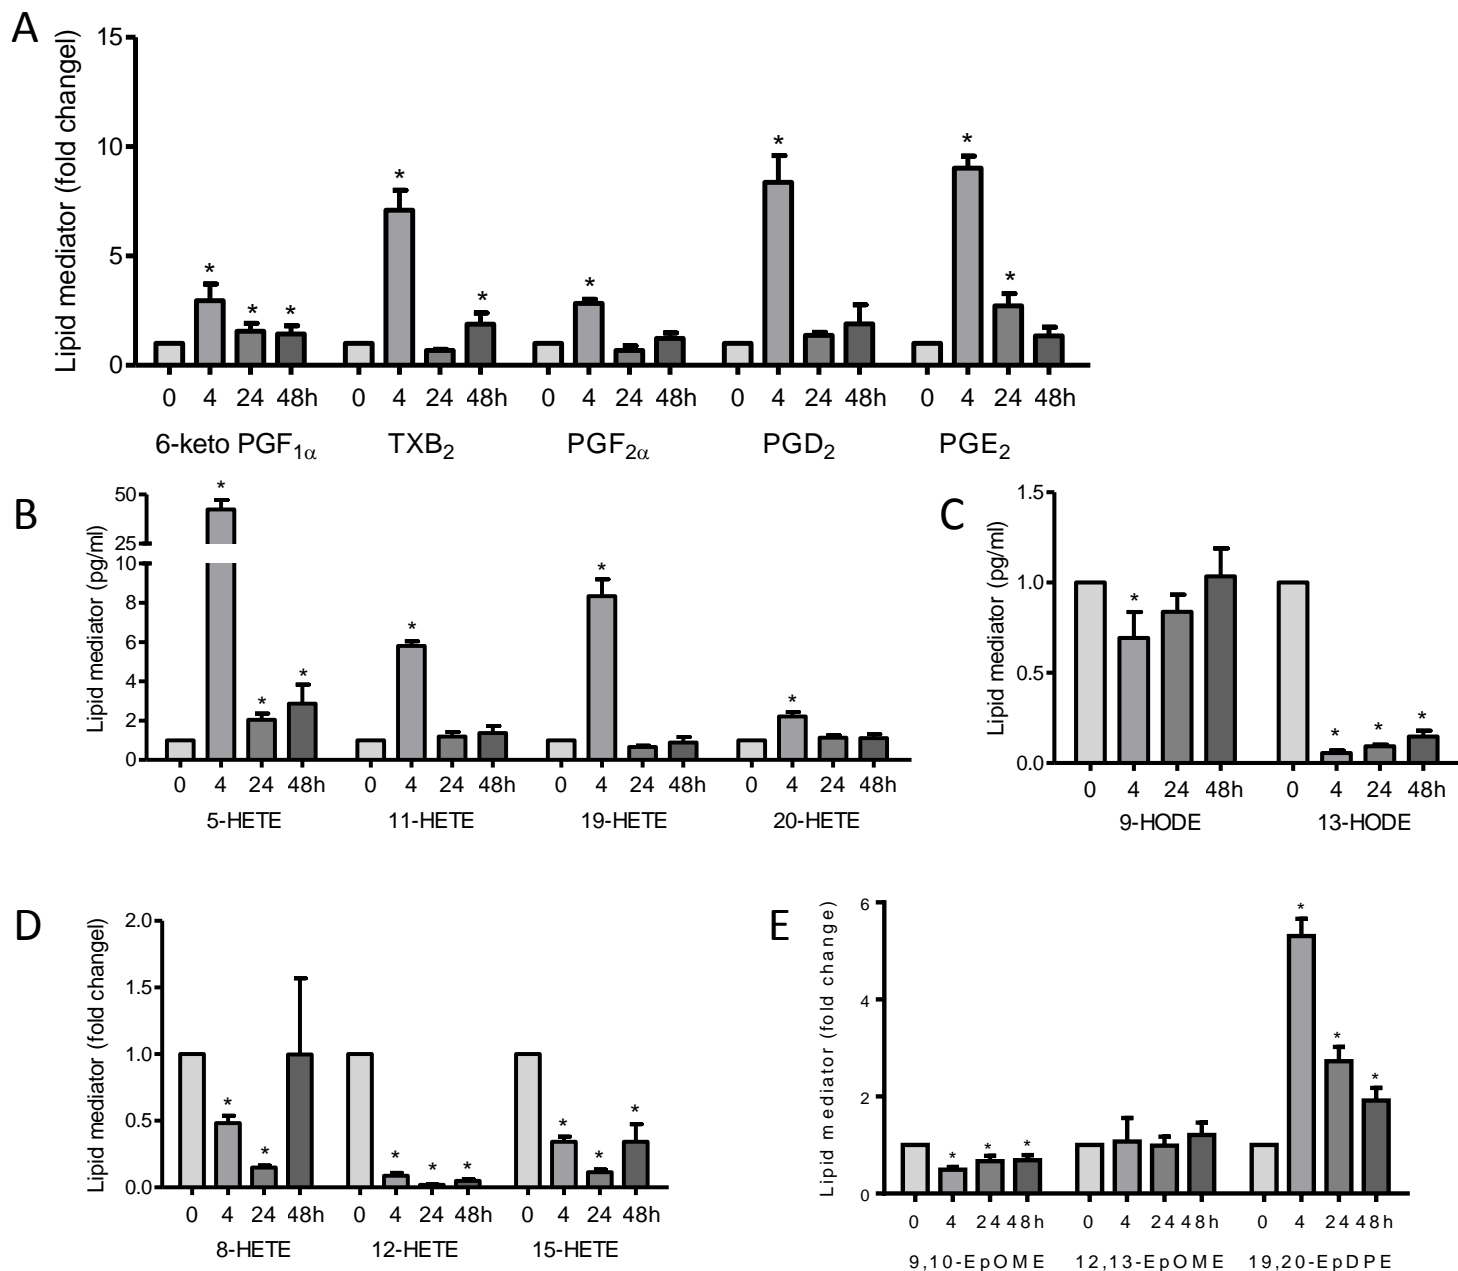

## Figure S2

### Figure S2. Epoxygenase enzyme expression in acute inflammation and resolution.

Examples of RT-PCR analysis of *Cyp2j5*, *Cyp2j6*, *Cyp2j9*, *Cyp2j13*, *Cyp2c44*, *Cyp2u1*, *PPAR- $\alpha$*  and  *$\beta$ -actin* in the cells from the peritoneal cavity of mice 0h, 24h, 48h and 72h post zymosan (1mg; i.p.). -RT indicates samples taken from 48h where the reverse transcriptase was omitted.

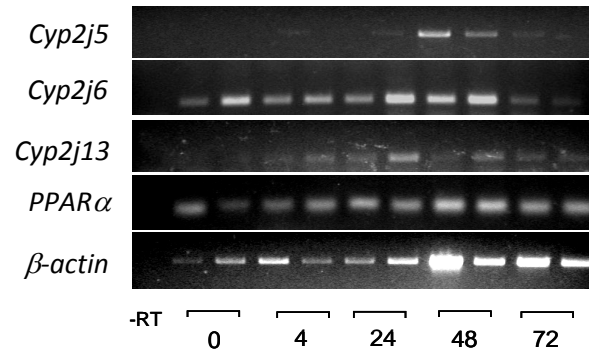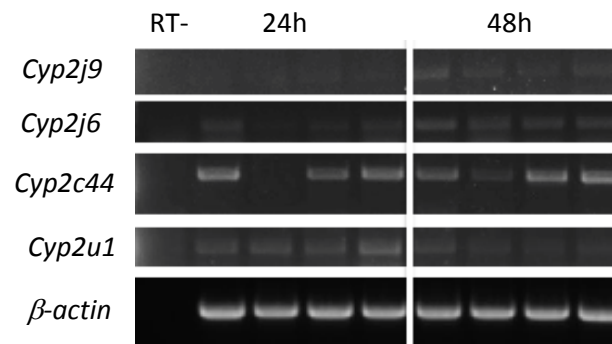

## Figure S3

**Figure S3. Time-course of monocyte and PMN accumulation during inflammatory resolution.** Accumulation of (A) Ly6c<sup>+</sup> monocytes and (B) Ly6g<sup>+</sup> PMNs at 48h, 72h and 96h post zymosan (1mg; i.p.). Mice were treated from 24h onwards every 12h with either sterile PBS (open bars; vehicle) or epoxl (SKF525A; closed bars; 30mg/kg i.p.). Data represents the mean  $\pm$  s.e.m of accumulated cells from n= 6 mice per experimental group.

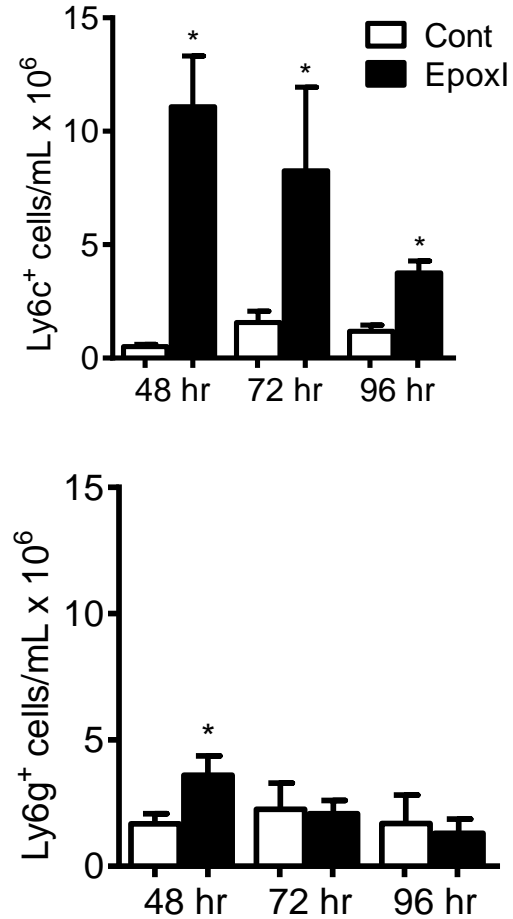

Figure S4

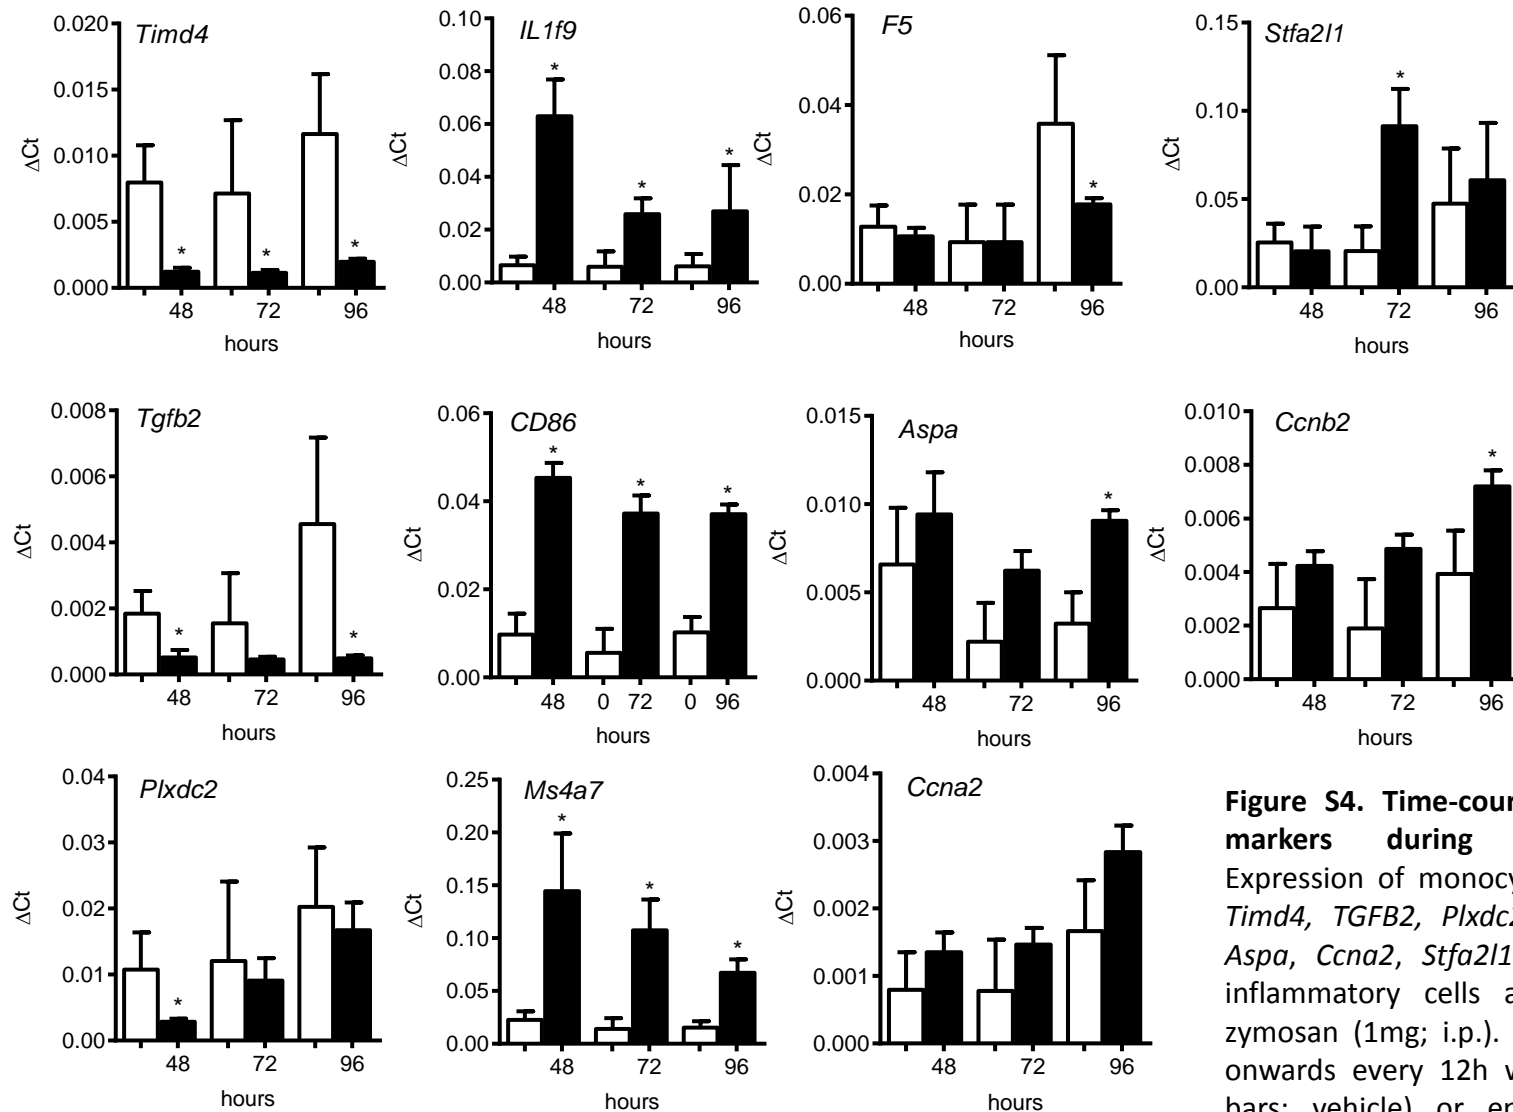

**Figure S4. Time-course of resolution phenotype markers during inflammatory resolution.** Expression of monocyte phenotype panel markers *Timd4*, *TGFB2*, *Plxdc2*, *IL1f19*, *CD86*, *Ms4a7*, *F5*, *Aspa*, *Ccna2*, *Stfa2l1*, and *Ccnb2* in the elicited inflammatory cells at 48h, 72h and 96h post zymosan (1mg; i.p.). Mice were treated from 24h onwards every 12h with either sterile PBS (open bars; vehicle) or epoxl (SKF525A; closed bars; 30mg/kg i.p.). Changes in mRNA levels were determined by qRT-PCR and the data represents the mean  $\pm$  s.e.m in DCt from n= 4 mice per experimental group.

Figure S5

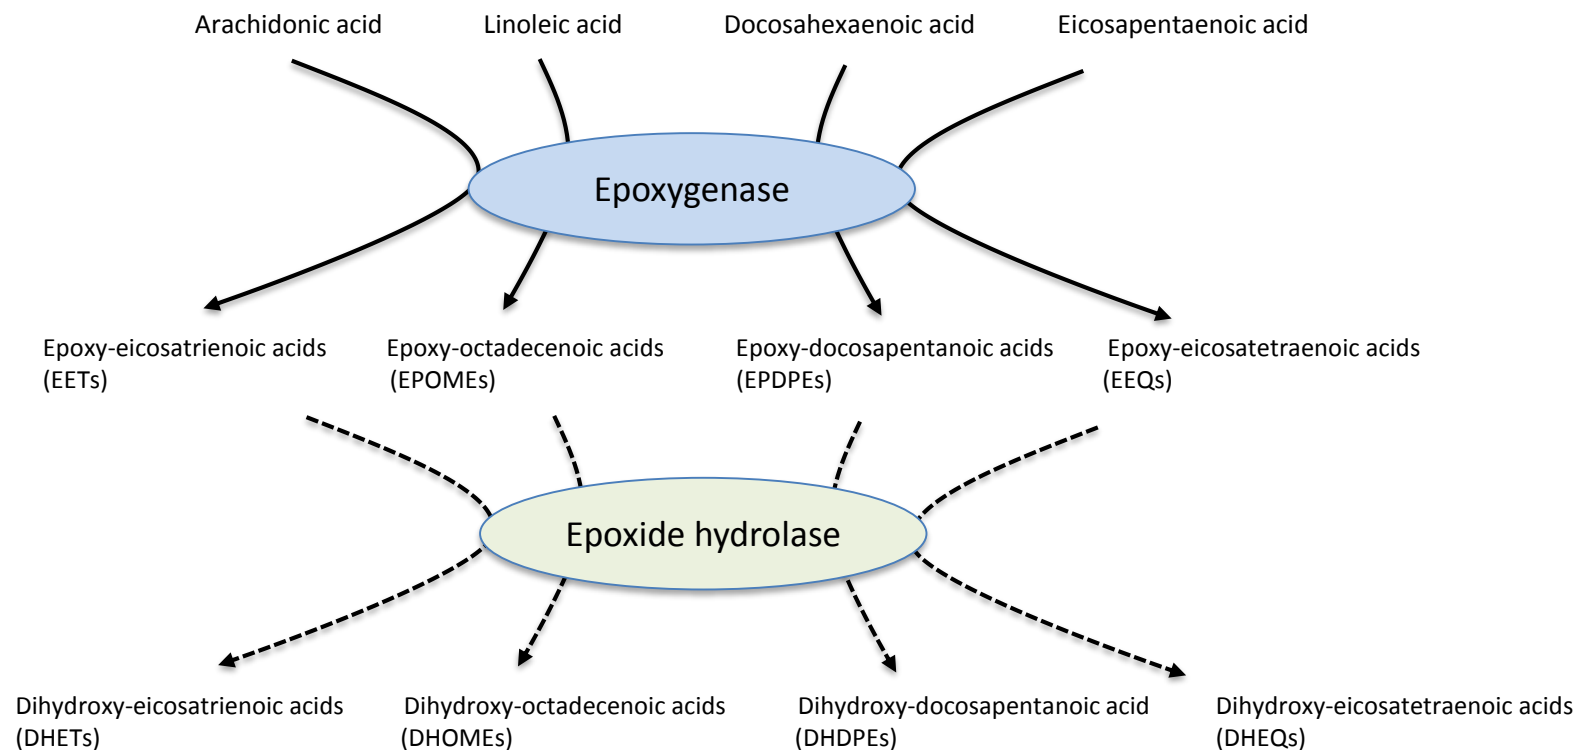

**Figure S8. Epoxy-oxylipin family generation from epoxygenase enzymes.** Epoxygenase enzymes utilize fatty acid substrates such as arachidonic acid, linoleic acid, docosahexaenoic acid and eicosapentaenoic acid to produce epoxy-oxylipins such as the EETs, EPOMEs, EPDPEs and EEQs respectively by insertion of molecular oxygen at the site of the double bond. These epoxy-oxylipin products are subsequently metabolized to DHETs, DHOMEs, DHDPEs and DHEQs respectively by epoxide hydrolase enzymes.

## Figure S6

**Figure S5. 9-EPOME induces Ccl2 mRNA in inflammatory monocytes *ex vivo*.** Relative *Ccl2* mRNA expression compared to  $\beta$ -actin in zymosan elicited monocytes treated *ex vivo* with 9,10-EpOME (1mM) or 12,13-EpOME (1mM). Cells were elicited at 36h and treated for a further 7h. The data represents the mean  $\pm$  s.e.m from n=3-5 mice per group. \* denotes  $p < 0.05$  by one sample t-test between or either treatment.

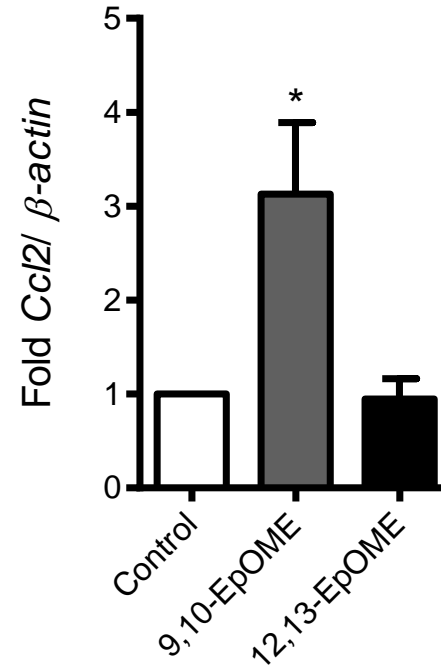

Figure S6

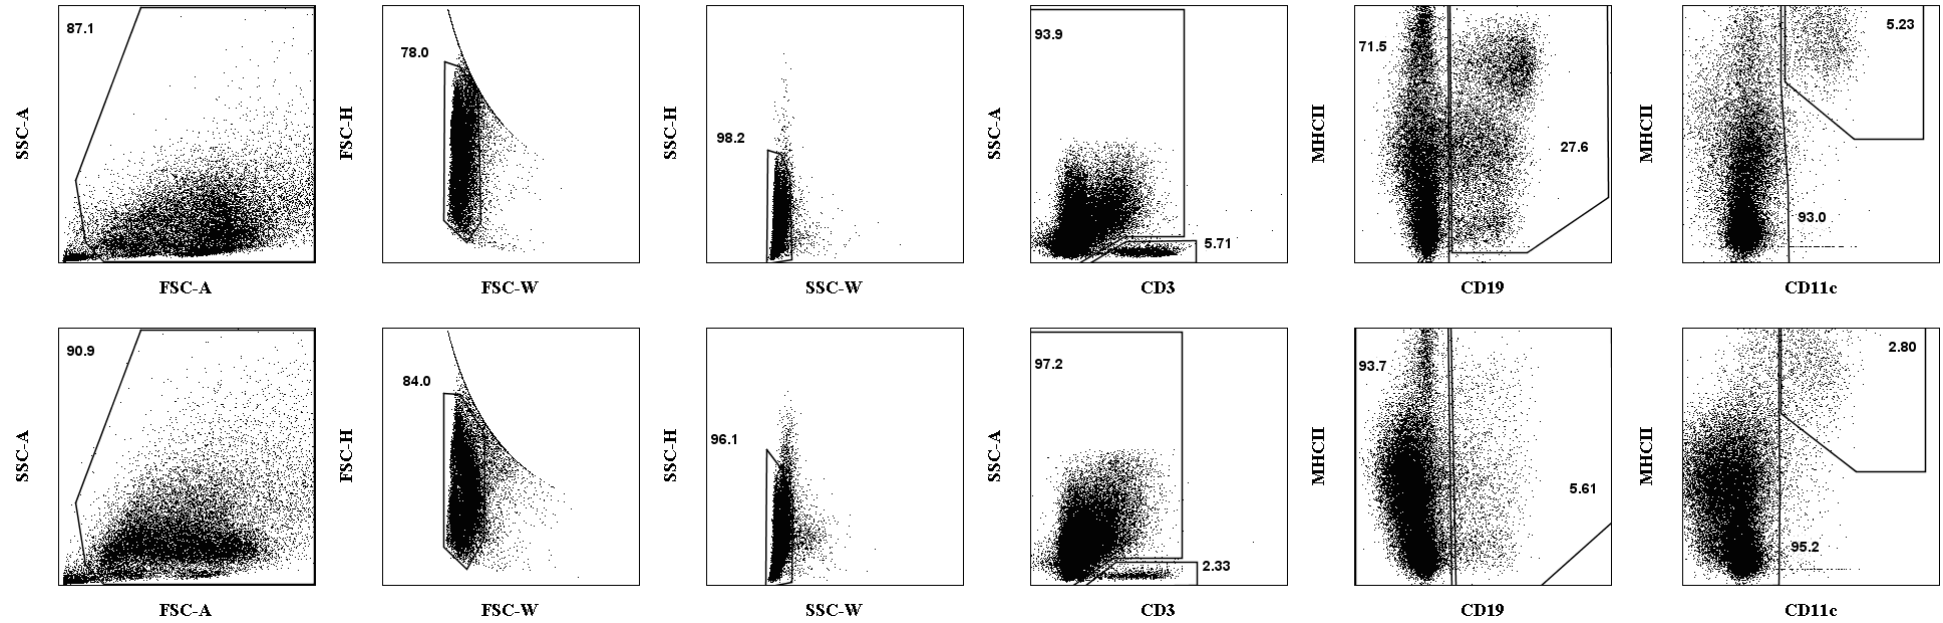

**Figure S6. Supplemental Methods: flow cytometry gating strategy.** Top panels show example of gated cells from vehicle control treated mice (48h), while bottom panels show comparable gating from Epoxl treated mice (30mg/kg; 48h).

Figure S7

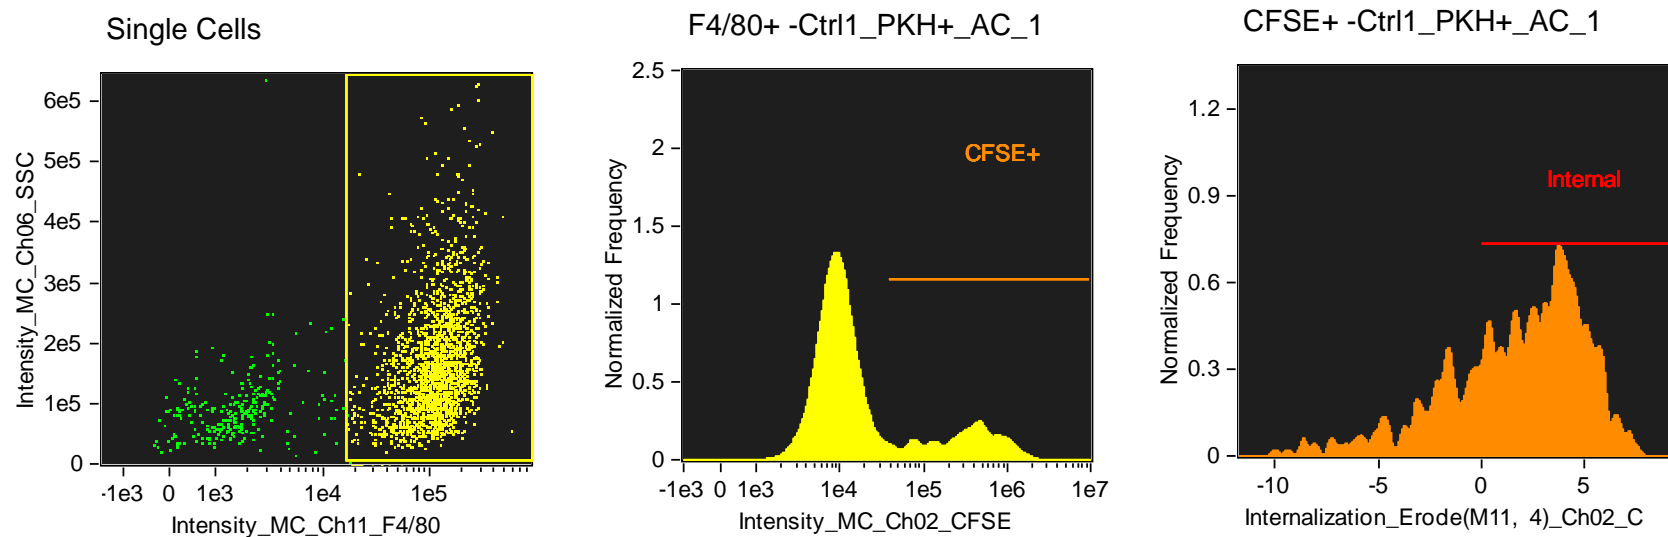

**Figure S7. Supplemental Methods: ImageStream analysis of macrophage / monocyte phagocytosis of CFSE labeled apoptotic cells.** Sequential images showing identification of single cells, identification of CFSE positive cells, and cell populations that have internalized CFSE positive cells.



Table S1. **Oxylipin formation in the presence of Epoxl.** Comparison of oxylipins in terms of fold (left) and total amounts (pg/ml; right) at 48h in the presence or absence of Epoxl (SKF525A; 30mg/kg) given at 24h and 36h. Inflammation was initiated by 1mg zymosan A per mouse. The data represents the mean  $\pm$  s.e.m from n=3-8 mice per group.

| Oxylipin                 | Control |       |   | Epoxl |       |   |
|--------------------------|---------|-------|---|-------|-------|---|
|                          | fold    | s.e.m | n | fold  | s.e.m | n |
| 6-keto PGF <sub>1a</sub> | 1.4     | 0.4   | 7 | 2     | 0.3   | 8 |
| TXB <sub>2</sub>         | 1.9     | 0.5   | 5 | 1     | 0.2   | 8 |
| PGF <sub>2a</sub>        | 1.2     | 0.2   | 7 | 1     | 0.1   | 8 |
| PGD <sub>2</sub>         | 1.9     | 0.9   | 7 | 1.6   | 0.3   | 8 |
| PGE <sub>2</sub>         | 1.3     | 0.4   | 7 | 1.3   | 0.2   | 8 |
| 5-HETE                   | 1.4     | 0.2   | 5 | 0.8   | 0.1   | 8 |
| 8-HETE                   | 0.11    | 0.03  | 5 | 0.12  | 0.03  | 8 |
| 11-HETE                  | 1.4     | 0.4   | 5 | 1.9   | 0.3   | 8 |
| 12-HETE                  | 0.05    | 0.01  | 5 | 0.02  | 0.004 | 8 |
| 15-HETE                  | 0.1     | 0.03  | 5 | 0.13  | 0.02  | 8 |
| 19-HETE                  | 0.9     | 0.3   | 5 | 1     | 0.3   | 8 |
| 20-HETE                  | 1.1     | 0.2   | 3 | 0.8   | 0.1   | 4 |
| 9-HODE                   | 1       | 0.2   | 7 | 1.1   | 0.1   | 8 |
| 13-HODE                  | 0.14    | 0.03  | 3 | 0.09  | 0.02  | 4 |
| 19,20-EpDPE              | 1.9     | 0.3   | 7 | 2.6   | 0.6   | 8 |

| Oxylipin                 | Control |       |   | Epoxl   |       |   |
|--------------------------|---------|-------|---|---------|-------|---|
|                          | [pg/ml] | s.e.m | n | [pg/ml] | s.e.m | n |
| 6-keto PGF <sub>1a</sub> | 283     | 81    | 7 | 404     | 61    | 8 |
| TXB <sub>2</sub>         | 113     | 30    | 5 | 60      | 12    | 8 |
| PGF <sub>2a</sub>        | 123     | 21    | 7 | 103     | 10    | 8 |
| PGD <sub>2</sub>         | 71      | 33    | 7 | 59      | 11    | 8 |
| PGE <sub>2</sub>         | 109     | 33    | 7 | 109     | 17    | 8 |
| 5-HETE                   | 45      | 6     | 5 | 26      | 4     | 8 |
| 8-HETE                   | 42      | 12    | 5 | 46      | 12    | 8 |
| 11-HETE                  | 114     | 33    | 5 | 155     | 24    | 8 |
| 12-HETE                  | 1187    | 237   | 5 | 475     | 95    | 8 |
| 15-HETE                  | 78      | 23    | 5 | 101     | 16    | 8 |
| 19-HETE                  | 36      | 12    | 5 | 40      | 12    | 8 |
| 20-HETE                  | 23      | 4     | 3 | 17      | 2     | 4 |
| 9-HODE                   | 18943   | 3789  | 7 | 20837   | 1894  | 8 |
| 13-HODE                  | 24659   | 5284  | 3 | 15852   | 3523  | 4 |
| 19,20-EpDPE              | 142     | 22    | 7 | 195     | 45    | 8 |

## Supplemental Methods: Mass spec analysis

Eicosanoid metabolites were extracted from exudates by solid-phase extraction and quantified by HPLC-MS/MS. Briefly, 1 ml exudates was spiked with internal standard (3 ng PGE<sub>2</sub>-d<sub>4</sub>, 10,11-DiHN, and 10(11)-EpHep (Cayman)) acidified with 100 µl of 1% acetic acid in 50% methanol and applied over HyperSep Retain SPE columns (Thermo Scientific, Bellefonte, PA) that had been prewashed with ethyl acetate, 100% methanol, and 0.1% acetic acid in 5% methanol. Columns were washed twice with 0.1% acetic acid in 5% methanol, dried under low pressure vacuum, and eluted with 0.5 ml of methanol and 1 ml of ethyl acetate into glass tubes containing 2 µl 30% glycerol. Samples were dried under gentle nitrogen flow and reconstituted in 50 µL of 30% ethanol. Triplicate 10 µl injections were performed. Online LC of extracted samples was performed with an Agilent 1200 series capillary HPLC (Agilent Technologies, Santa Clara, CA). Separations were achieved using a Halo C18 column (2.7 µm, 100 × 2.1 mm; MAC-MOD Analytical, Chadds Ford, PA), which was held at 50°C and a flow rate of 400 µl/min. Mobile phase A was 0.1% acetic acid in 85:15 water:acetonitrile. Mobile phase B was 0.1% acetic acid in acetonitrile. Gradient elution was used and the mobile phase was varied as follows: 20% B at 0 min, ramp from 0 to 5 min to 40% B, ramp from 5 to 7 min to 55% B, ramp from 7 to 13 min to 64% B. From 13 to 19 min the column was flushed with 100% B at a flow rate of 550 µ l/min before being returned to starting conditions and equilibrated for 6 min. Electrospray ionization MS/MS was used for detection. Analyses were performed on an MDS Sciex API 3000 equipped with a TurbolonSpray source (Applied Biosystems, Foster City, CA). Desolvation gas was heated to 425°C at a flow rate of 6 l/ min. All analytes were monitored simultaneously in a scheduled multiple reaction monitoring experiment as negative ions at parent ion-product ion mass/charge ratio transitions as listed below. Peak area and analyte concentrations were performed on Analyst 1.5.1 Software (Applied Biosystems, Foster City, CA) based on analyte peak area:internal standard peak area ratios of samples compared to a standard curve for each analyte. Peaks were scored blind to determine those that were present or absent that were not. Parental EETs, THOMEs, PGB<sub>2</sub>, and 17,18-EPETE were all below detection).

The m/z transitions for each analyte were as follows:

| <b>Analytes</b>    | <b>m/z</b>    |
|--------------------|---------------|
| 6ketoPGF1a         | 369.1 > 163.1 |
| TXB2               | 369.1 > 168.7 |
| PGF2a              | 353.1 > 309.1 |
| PGE2               | 351 > 270.9   |
| PGD2               | 351 > 270.91  |
| 19,20-DiHDPA       | 361.2 > 273.2 |
| 17,18-DHET         | 335.2 > 247.2 |
| 12,13-DHOME        | 313.3 > 128.8 |
| 9,10-DHOME         | 313.3 > 170.5 |
| 14,15-DHET         | 337.3 > 206.8 |
| 11,12-DHET         | 337.3 > 166.9 |
| 8,9-DHET           | 337.3 > 126.7 |
| 5,6-DHET           | 337.3 > 144.4 |
| 13-HODE            | 295 > 195.1   |
| 9-HODE             | 295 > 170.7   |
| 20-HETE            | 319.1 > 289   |
| 19-HETE            | 319.1 > 230.6 |
| 15-HETE            | 319.1 > 218.7 |
| 12-HETE            | 319.1 > 178.6 |
| 11-HETE            | 319.1 > 166.8 |
| 8-HETE             | 319.1 > 154.5 |
| 5-HETE             | 319.1 > 114.6 |
| 19(20)-EpDPE       | 343.2 > 281.1 |
| 17(18)-EpETE       | 317.1 > 258.7 |
| 12(13)-EpOME       | 295 > 194.8   |
| 9(10)-EpOME        | 295 > 170.9   |
| 14(15)-EET         | 319.1 > 218.9 |
| 11(12)-EET         | 319.1 > 207.5 |
| 8(9)-EET           | 319.1 > 150.9 |
| 5(6)-EET           | 319.1 > 191   |
| Internal Standards |               |
| d4-PGE2            | 355 > 275     |
| 10,11-DiHN         | 329.2 > 310.9 |
| 10,11-EpHep        | 283.3 > 264.9 |

## Supplemental methods: RT-PCR

Amplification was performed in a Techgene Techne TC-312 thermal cycler programmed for an initial denaturation of 5min at 94°C, followed by 25-35 cycles of 1min at 94°C, 1min at 57-60°C and 2min at 72°C, and a final extension of 7min at 72°C. 12µl of the PCR reaction was subjected to electrophoresis on 1.5% agarose gel and the products visualized by ethidium bromide staining. The gel image was captured with a Gel doc 1000 BIORAD digital camera.

PCR primers used:

|                                          |                                      |
|------------------------------------------|--------------------------------------|
| Ly6C #1: TGCCACTGTGCTGCAACCT             | CYP2C38 #1: GGACAGGAGCCGCATGCCCTAT   |
| Ly6C #2: TGATTGGCACACCAGCAGGGG           | CYP2C38 #2: GCTGGTAATGGGGTGGCAGAGTGA |
| ccr2 #1: GCTTGATGAAGGGGCCACCACAC         | CYP2C39 #1: GGCCAGTGATGCCTGATCACAAT  |
| ccr2 #2: ACACAGCCACCACCAAGTGAC           | CYP2C39 #2: AGTGGGCCGTGAGCCCAAAT     |
| cx3cr1 #1: TGCTCACGGCGGCATGTCTG          | cyp2c44 #1: CCCGCCAACCCCTCGGGATTAC   |
| cX3cr1 #2: TGTGACCCGAGACAGCGGGA          | CYP2C44 #2: GGCTCCACCAGAGCCTTTAGGG   |
| ccl2 #1: TGCTGTTACAGTTGCCGGCT            | CYP2C50 #1: GCTGCGTGATAGCAAAGAGTTCCC |
| ccl2 #2: GGGGTCAGCACAGACCTCTCTCTT        | CYP2C50 #2: ATGTCCCAGCTGGAGCCAGG     |
| cyP2j5 #1: GGCCATGGCGTCTGCCCTTT          | CYP2C54 #1: GAGCACCCCTGGTTGCAGG      |
| CYP2J5 #2: TGGCTTCCACCAGGTGATGGGT        | CYP2C54 #2: TGGAAAGCAGTGGAGCCAGGC    |
| CYP2j6 #1: CCACCGCATCTGTGCTGTCCC         | CYP2C55 #1: AAGCTGCCATGGATCCAGTCCTG  |
| CYP2J6 #2:<br>TGAAAAGGCATGCCACTAAGCTCAT  | CYP2C55 #2: GAAGCGCCGAAGTCCTTCCAT    |
| CYP2j9 #1:<br>ACTACAGGCAGTGTCCCTTGGGGAA  | CYP2A1 #1: GGGCTTGCCTTCATTGGGCA      |
| CYP2J9 #2: TCGGAGAAGAGTGACTGGGCGA        | CYP2A1 #2: CCTGGCTGACTGGTTCGAAGTGG   |
| CYP2J13 #1:<br>AAGTGCTCAAGCGCTCAAGTGCC   | CYP2U1 #1: CAGCTTCGACGAGGACTACC      |
| CYP2J13 #2:<br>CGTTCCTCCAAAGGTGATGGAGCA  | CYP2U1 #2: CAGCTGCTCTCCATACACA       |
| CYP2C29 #1:<br>ACTGTGTCAGTAAGGAGGTTTCGCT | cyp2s1 #1: GCACTGAGGTCTTCCCTCTG      |
| CYP2C29 #2: GTGGGGTCACAGGTTGAGCC         | CYP2S1 #2: TGCCTTGATACGTGGTGTGT      |
|                                          | b-Actin #1: GTGGGGCGCCCCAGGCACCA     |
|                                          | b-Actin #2: CTCCTTAATGTCACGCACGATTT  |
